# Supplementary material for: Evolution of tunnels in α/β-hydrolase fold proteins—What can we learn from studying epoxide hydrolases?
Source: PLoS Comput Biol. 2022 May 17;18(5):e1010119. doi: 10.1371/journal.pcbi.1010119 (PMC9140254; doi:10.1371/journal.pcbi.1010119)
Supplement: S11 Table — (XLSX) [file pcbi.1010119.s011.xlsx]

## Sheet: Arkusz1
MDRank	Name	Tunnel-lining residues	Tunnel-lining residues without the surface residues	Surface tunnel-lining residues
2	Tc/m2	D102, A147, S148, Y150, K177, W178, D179, Y209, D249, L250, A251, L252, H277, F278	D102, A147, S148, Y150, W178, Y209, D249, A251, L252, H277, F278	K177, D179, L250
5	Tc/m_side	F35, D102, Y150, K177, W178, D179, R180, P181, S182, A183, M184, Y209, D248, D249, L250, A251, L252, C275, G276, H277, F278, W281, E282	F35, D102, Y150, W178, M184, Y209, D249, A251, L252, C275, G276, H277, F278, W281, E282	K177, D179, R180, P181, S182, A183, D248, L250
1	Tc/m_back	F35, P77, D78, L80, I81, H101, D102, W103, G104, G105, A106, I107, W109, G110, L113, N127, A128, P129, H130, P131, A131, F134, L138, S148, Y150, I151, F154, W178, D179, Y208, Y209, S212, P213, I214, P232, L234, D249, A251, L252, H277, F278	F35, P77, L80, I81, H101, D102, W103, G104, G105, A106, I107, W109, G110, L113, N127, A128, P129, H130, P131, F134, L138, S148, Y150, I151, F154, W178, Y208, Y209, S212, P213, L234, D249, A251, L252, H277, F278	D78, A132, D179, I214, P232
